# Supplementary material for: RNA-binding protein RALY reprogrammes mitochondrial metabolism via mediating miRNA processing in colorectal cancer
Source: HighWire-hosted journal article supplement (doi:10.1136/gutjnl-2020-320652), 2020-11-20
Supplement: gutjnl-2020-320652supp003_data_supplement.xlsx [file gutjnl-2020-320652supp003_data_supplement.xlsx]

## Sheet: Tabel 2
Table 2. Demographic characteristics of TCGA CRC patients.
Characteristics	Value (N=384)
RALY level
high (>80%)	77 (20%)
low (<20%)	77 (20%)
normal	230 (60%)
Type
COAD	226 (59%)
READ	158 (41%)
Sex, N. (%)
Male	211 (55%)
Female	173 (45%)
Age Group, y, N. (%)
< 65	159 (41%)
≥ 65	225 (59%)
Pathologic Stage, N. (%)
I	69 (18%)
II	136 (35%)
III	115 (30%)
IV	51 (13%)
NA	13 (3%)
T
I	16 (4%)
II	67 (17%)
III	260 (68%)
IV	39 (10%)
NA	2 (1%)
N
N0	216 (56%)
N1	95 (25%)
N2	69 (18%)
NA	4 (1%)
M
M0	292 (76%)
M1	50 (13%)
NA	42 (11%)
KRAS Mutation, N. (%)
Yes	134 (35%)
No	250 (65%)
BRAF
Abnormal	37 (10%)
normal	347 (90%)
MSI
MSI events >=3	134 (35%)
MSI events <3	63 (16%)
Unknown	187 (49%)
